# Supplementary material for: Is the Glycoprotein Responsible for the Differences in Dispersal Rates between Lettuce Necrotic Yellows Virus Subgroups?
Source: MDPI journal article supplement (doi:10.3390/v14071574), 2022-07-20
Supplement: s1 [file s1]

**Table S1:** Validation using SAVES of predicted 3D structures built by I-TASSER and Robetta. ORF stands for open reading frame

| Program  | Sample                          | ERRAT (%)    | VERIFY3D (%) | Ramachandran Plot (%) |                             |                             |                   |
|----------|---------------------------------|--------------|--------------|-----------------------|-----------------------------|-----------------------------|-------------------|
|          |                                 |              |              | Most Favoured Region  | Additional Allowable Region | Generously Allowable Region | Disallowed Region |
| I-TASSER | LNyV-SI AU2                     | 93.4         | 56.5         | 66.5                  | 26.2                        | 4.7                         | 2.6               |
|          | LNyV-SI HV33 (NZ6)              | 68.5         | 36.2         | 58.2                  | 32.7                        | 6.3                         | 2.8               |
|          | LNyV-SII HV19 (NZ1)             | 76.4         | 40.8         | 57.4                  | 33.5                        | 7                           | 2.1               |
|          | VSV                             | 92           | 80.6         | 78.8                  | 17.3                        | 1.4                         | 2.5               |
|          | <b>Average</b>                  | <b>82.58</b> | <b>53.53</b> |                       |                             |                             |                   |
| ROBETTA  | LNyV-SI AU2                     | 82           | 90.2         | 84.5                  | 14.3                        | 0.7                         | 0.5               |
|          | LNyV-SI HV33 (NZ6)              | 86.9         | 80.1         | 85.9                  | 13.8                        | 0.2                         | 0                 |
|          | LNyV-SII HV19 (NZ1)             | 84.6         | 88.2         | 85.9                  | 12.2                        | 0.5                         | 1.5               |
|          | LNyV-SII HV19 (NZ1) DIII mutant | 85.1         | 90.4         | 82.6                  | 15.3                        | 1.4                         | 0.7               |
|          | VSV                             | 90.1         | 87.7         | 93.9                  | 5.8                         | 0.3                         | 0                 |
|          | <b>Average</b>                  | <b>85.74</b> | <b>87.32</b> |                       |                             |                             |                   |
